# Supplementary material for: The well-coordinated linkage between acidogenicity and aciduricity via insoluble glucans on the surface of Streptococcus mutans
Source: PubMed Central journal article supplement (PMC4675080; doi:10.1038/srep18015), 2015-12-10
Supplement: srep18015-s1.pdf [file srep18015-s1.pdf]

## **Supplementary Information for**

**The well-coordinated linkage between acidogenicity and aciduricity via insoluble glucans  
on the surface of *Streptococcus mutans***

Lihong Guo, Jeffrey S. McLean, Renate Lux, Xuesong He<sup>‡</sup> and Wenyuan Shi<sup>‡</sup>

<sup>‡</sup>Corresponding authors

Email: [xhe@ucla.edu](mailto:xhe@ucla.edu), [wshi@dentistry.ucla.edu](mailto:wshi@dentistry.ucla.edu)

**This document contains:**

- 1) Supplementary Figures: Fig. S1-S6**
- 2) Supplementary Tables: Table S1-S3**

|

# 1) Supplementary Figures:

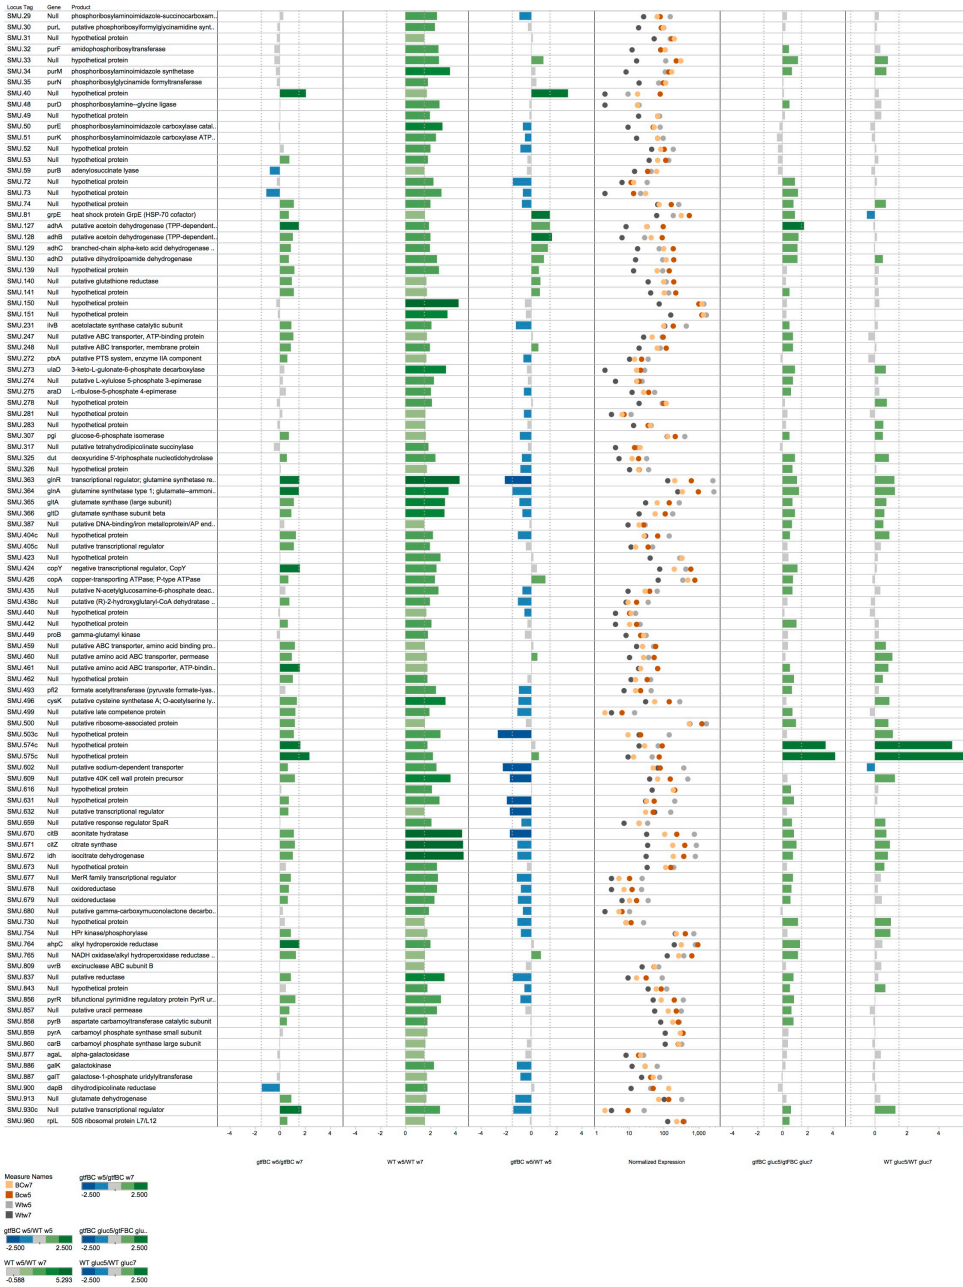

**Fig. S1: Genes with log<sub>2</sub> 1.5 fold increase in the WT pH 5.5 relative to pH 7.5.** Dashed vertical lines indicate significant fold change. Colored bars indicate log<sub>2</sub> fold changes for differential expression. Filled colored circles indicate normalized expression values for each condition tested with sucrose. gtfBC mutant with sucrose pH 5.5 (bcw5), gtfBC mutant with sucrose pH 7.5 (bcw7), WT with sucrose pH 5.5 (Wtw5), WT with sucrose pH 7.5 (wtw7.5).

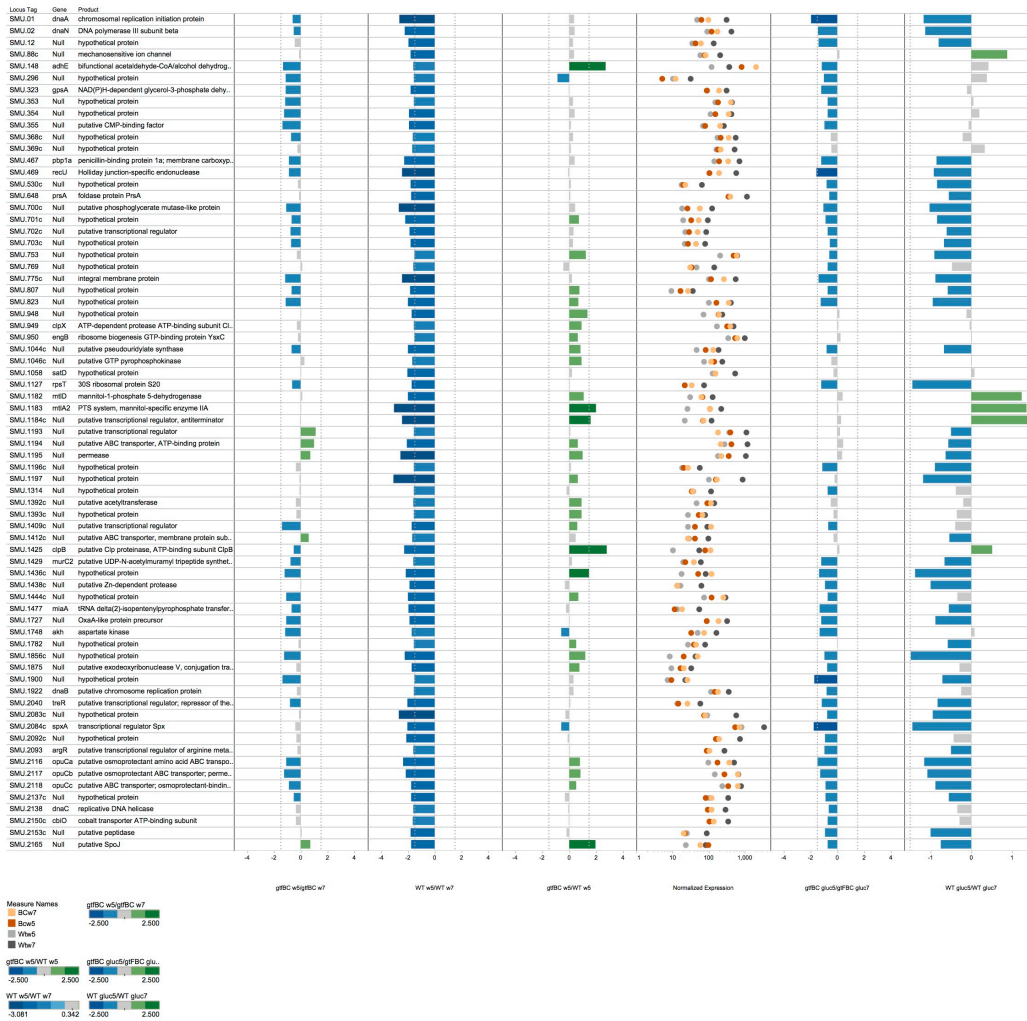

**Fig. S2. Genes with greater than  $\log_2 1.5$  fold decrease in the WT at pH 5.5 relative to pH 7.5.** Dashed vertical lines indicate significant fold change. Colored bars indicate  $\log_2$  fold changes for differential expression. Filled colored circles indicate normalized expression values for each condition tested with sucrose. gtfBC mutant with sucrose pH 5.5 (bcw5), gtfBC mutant with sucrose pH 7.5 (bcw7), WT with sucrose pH 5.5 (Wtw5), WT with sucrose pH 7.5 (Wtw7).

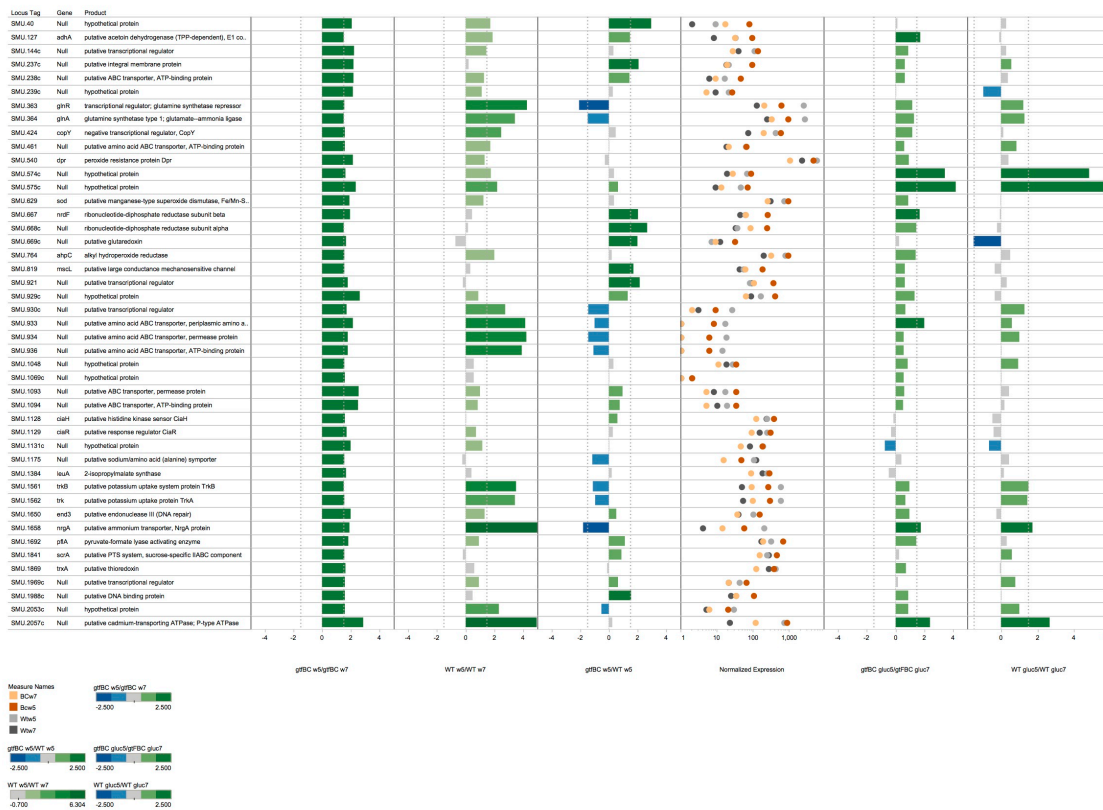

**Fig. S3: Genes with log<sub>2</sub> 1.5 fold increase in the gtfBC mutant at pH 5.5 relative to pH 7.5.** Dashed vertical lines indicate significant fold change. Colored bars indicate log<sub>2</sub> fold changes for differential expression. Filled colored circles indicate normalized expression values for each condition tested with sucrose. gtfBC mutant with sucrose pH 5.5 (bcw5), gtfBC mutant with sucrose pH 7.5 (bcw7), WT with sucrose pH 5.5 (Wtw5), WT with sucrose pH 7.5 (wtw7.5).

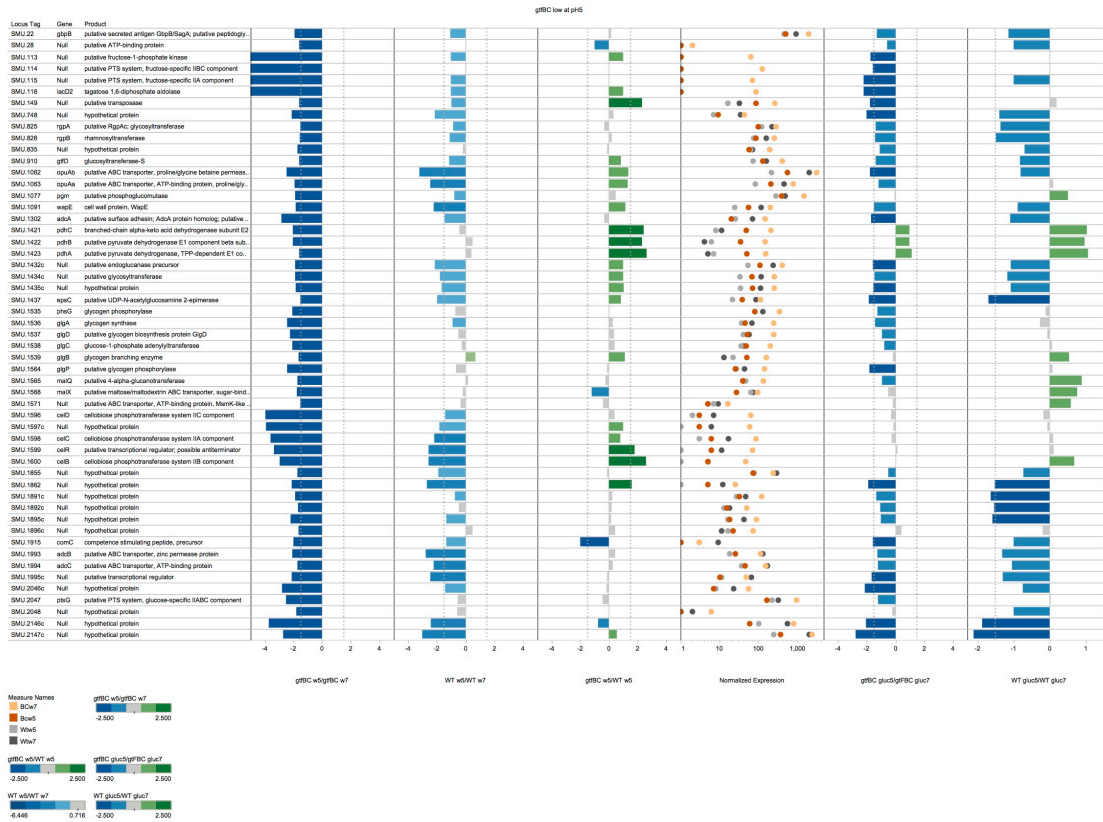

**Fig. S4: Genes with  $\log_2$  1.5 fold decrease in the gtfBC mutant at pH 5.5 relative to pH 7.5.** Dashed vertical lines indicate significant fold change. Colored bars indicate  $\log_2$  fold changes for differential expression. Filled colored circles indicate normalized expression values for each condition tested with sucrose. gtfBC mutant with sucrose pH 5.5 (bcw5), gtfBC mutant with sucrose pH 7.5 (bcw7), WT with sucrose pH 5.5 (Wtw5), WT with sucrose pH 7.5 (wtw7.5).

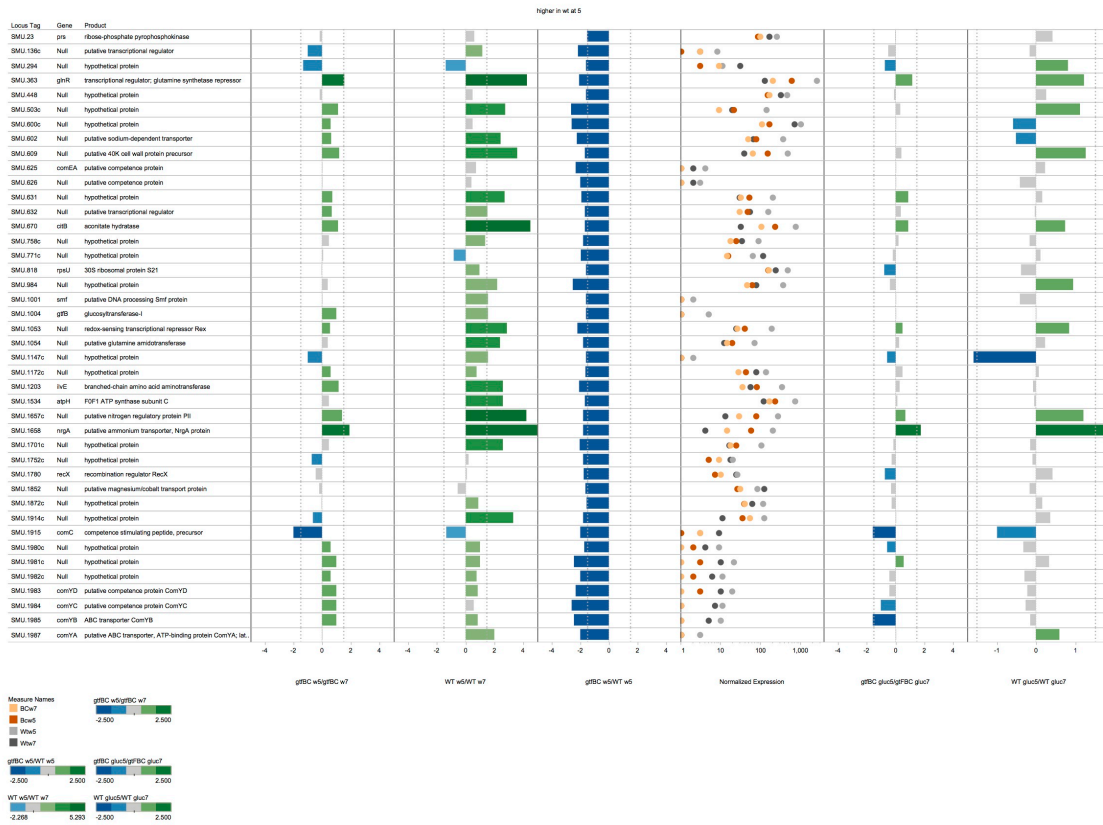

**Fig. S5: Genes with  $\log_2$  1.5 fold increase in the WT at pH 5.5 relative to gtfBC mutant pH 5.5.** Dashed vertical lines indicate significant fold change. Colored bars indicate  $\log_2$  fold changes for differential expression. Filled colored circles indicate normalized expression values for each condition tested with sucrose. gtfBC mutant with sucrose pH 5.5 (bcw5), gtfBC mutant with sucrose pH 7.5 (bcw7), WT with sucrose pH 5.5 (Wtw5), WT with sucrose pH 7.5 (wtw7.5).

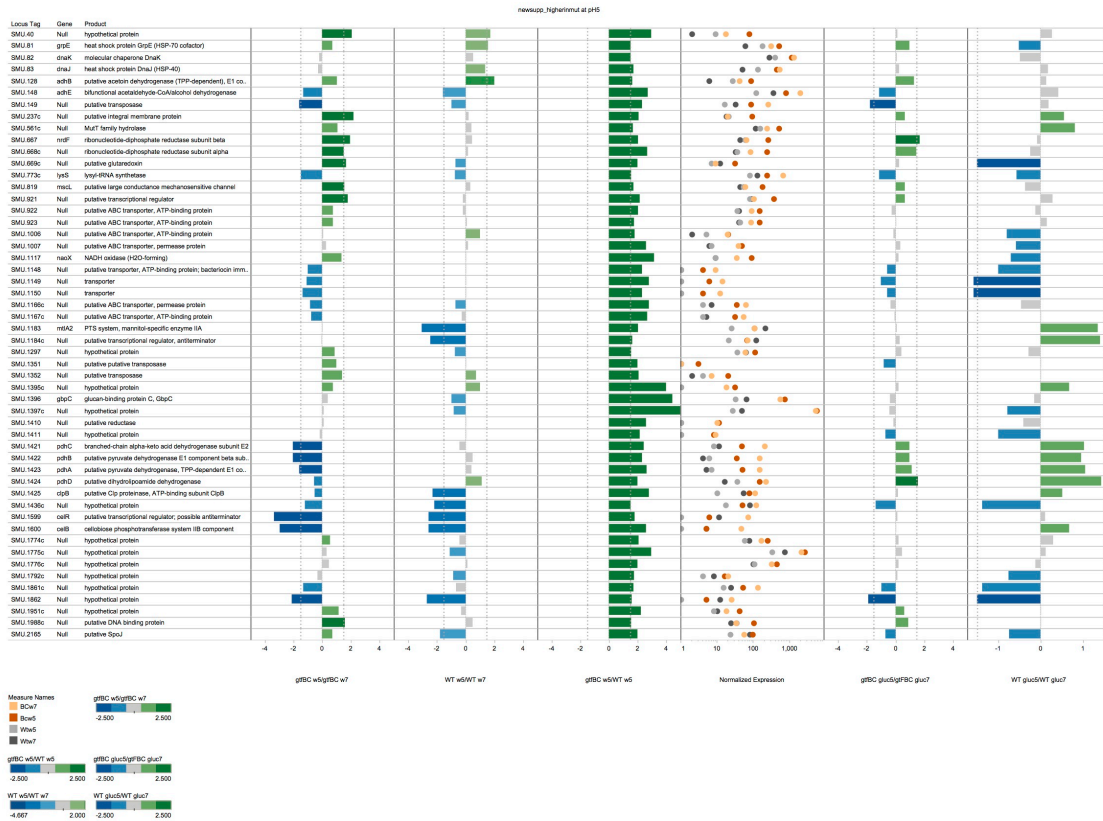

**Fig. S6: Genes with  $\log_2$  1.5 fold decrease in the WT at pH 5.5 relative to gtfBC mutant pH 5.5.** Dashed vertical lines indicate significant fold change. Colored bars indicate  $\log_2$  fold changes for differential expression. Filled colored circles indicate normalized expression values for each condition tested with sucrose. gtfBC mutant with sucrose pH 5.5 (bcw5), gtfBC mutant with sucrose pH 7.5 (bcw7), WT with sucrose pH 5.5 (Wtw5), WT with sucrose pH 7.5 (wtw7.5).

## 2) Supplementary Tables:

**S1 Table. Primers used in this study**

| Gene name   | Primer sequence (5'-3', forward and reverse)          |
|-------------|-------------------------------------------------------|
| <i>gtfB</i> | AGCAATGCAGCCAATCTACAAAT<br>ACGAACTTTGCCGTTATTGTCA     |
| <i>gtfC</i> | GGTTTAACGTCAAAATTAGCTGTATTAGC<br>CTCAACCAACCGCCACTGTT |
| <i>atpA</i> | TATTGCTCGTGCTTGCGGAC<br>TTTCACCCAGACCATCAACAGG        |
| <i>atpD</i> | GGCGACAAGTCTCAAAGAATTG<br>AACCATCAGTTGACTCCATAGC      |
| <i>msmK</i> | CCTTTATATTGATGATAAACTCA<br>CATATTTTCATAAACGCTCAT      |
| <i>dexB</i> | AATGGCAGACTGAGTTGGA<br>CACGCATAAGGTGAAGAAG            |
| 16S rRNA    | CTTACCAGGTCTTGACATCCCG<br>ACCCAACATCTCACGACACGAG      |



**S2 Table. The number of differentially regulated genes in *S. mutans* wt and *gtfBC* under different conditions.**

|                                                        | # genes up-regulated | # genes down-regulated |
|--------------------------------------------------------|----------------------|------------------------|
| <sup>a</sup> wt sucrose pH5.5/wt sucrose pH7           | 192                  | 96                     |
| <sup>b</sup> gtfBC sucrose pH5.5/<br>gtfBC sucrose pH7 | 47                   | 57                     |
| <sup>c</sup> gtfBC glucose pH5.5/<br>gtfBC glucose pH7 | 11                   | 31                     |
| <sup>d</sup> wt glucose pH5.5/ wt<br>glucose pH7       | 14                   | 17                     |

<sup>a</sup> wild type *S. mutans* cells pre-grown in the presence of sucrose were subjected to 3-hr exposure to buffered (pH5.5 and pH7)MDM medium;

<sup>b</sup> gtfBC mutant cells pre-grown in the presence of sucrose were subjected to 3hr exposure to buffered (pH5.5 and pH7) MDM medium;

<sup>c</sup> gtfBC mutant cells pre-grown in the presence of glucose were subjected to 3-hr exposure to buffered (pH5.5 and pH7)MDM medium;

<sup>d</sup> wild type *S. mutans* cells pre-grown in the presence of glucose were subjected to 3hr exposure to buffered (pH5.5 and pH7) MDM medium;

**S3 Table. qPCR analysis of relative expression of selected genes in *S. mutans* wild type and *gtfBC*-deficient mutant grown at neutral or acidic pH in the presence of sucrose or glucose.**

| Functional class annotation             | Gene Name         | Sugar added | Wild-type                                        | <i>gtfBC</i> mutant                              |
|-----------------------------------------|-------------------|-------------|--------------------------------------------------|--------------------------------------------------|
|                                         |                   |             | Fold change (pH 5.5 vs pH7.5) <sup>a</sup>       |                                                  |
|                                         |                   |             | qPCR (avg ± SD)                                  |                                                  |
| Insoluble glucans synthesis             | <i>gtfB</i>       | sucrose     | 2.63±0.55                                        |                                                  |
|                                         |                   | glucose     | 0.83±0.22                                        |                                                  |
| Insoluble glucans synthesis             | <i>gtfC</i>       | sucrose     | 2.27±0.71                                        |                                                  |
|                                         |                   | glucose     | 0.46±0.13                                        |                                                  |
| F <sub>1</sub> F <sub>0</sub> -H/ATPase | <i>atp</i> operon | sucrose     | <i>atpA</i> :2.61±1.27<br><i>atpD</i> :8.10±2.56 | <i>atpA</i> :1.02±0.68<br><i>atpD</i> :1.00±0.16 |
|                                         |                   | glucose     | <i>atpA</i> :1.51±0.31<br><i>atpD</i> :1.07±0.21 | <i>atpA</i> :0.95±0.53<br><i>atpD</i> :0.88±0.22 |
| Multiple-sugar metabolism (msm)         | <i>msmK</i>       | sucrose     | 4.75±1.44                                        | -2.64±0.89                                       |
|                                         |                   | glucose     | 1.71±0.15                                        | -3.16±1.45                                       |
|                                         | <i>dexB</i>       | sucrose     | 3.42±1.69                                        | -3.52±1.71                                       |
|                                         |                   | glucose     | 1.87±0.42                                        | -2.67±0.42                                       |

<sup>a</sup> Normalized expression was calculated by dividing the expression in *S. mutans* at pH 5.5 by the expression at pH 7.5.
